1 **Ubiquitination and degradation of NF90 by Tim-3 inhibits antiviral innate immunity**

2 Shuaijie Dou<sup>1,2\*</sup>, Guoxian Li<sup>1,3\*</sup>, Ge Li<sup>1\*</sup>, Chunmei Hou<sup>1</sup>, Yang Zheng<sup>4</sup>, Lili Tang<sup>1</sup>; Yang  
3 Gao<sup>1</sup>, Rongliang Mo<sup>1</sup>, Yuxiang Li<sup>1</sup>; Renxi Wang<sup>1,5\*</sup>, Beifen Shen<sup>1</sup>, Jun Zhang<sup>3\*</sup>, Gencheng  
4 Han<sup>1\*</sup>

5 1. Institute of Military Cognition and Brain Sciences, Beijing 100850, China

6 2. Anhui Medical University, Hefei, 230032, China

7 3. Institute of Immunology, Medical School of Henan University, Kaifeng 475001, China

8 4. Department of Oncology, First hospital of Jilin University, Changchun 13000, China

9 5. Beijing Institute of Brain Disorders, Laboratory of Brain Disorders, Ministry of Science  
10 and Technology, Collaborative Innovation Center for Brain Disorders, Capital Medical  
11 University, Beijing, China

12 **Correspondence:** [genchenghan@163.com](mailto:genchenghan@163.com) or [zhangjun@henu.edu.cn](mailto:zhangjun@henu.edu.cn), or  
13 [wang\\_renxi@hotmail.com](mailto:wang_renxi@hotmail.com)

14 \* These authors contribute equally to this work

15 **Running title**

16 Tim-3 inhibits NF90-mediated antiviral immunity

17

18 **Funding support**

19 This work was supported by the National Natural Sciences Foundation of China (grants no.  
20 81971473, 81771684), and the Beijing Natural Sciences Foundation (grant no.7192145).

21 **Abbreviations**

22 Nuclear Factor 90, NF90; Stress granules, SGs; Vesicular Stomatitis Virus, VSV; Protein  
23 kinase R, PKR; the eukaryotic translation initiation factor 2 $\alpha$  (eIF2 $\alpha$ ); Ras-GAP SH3-  
24 binding protein-1, G3BP1; T-cell intracellular antigen-1 TIA-1; tripartite motif-containing  
25 protein 47, TRIM47.

26

27 **Abstract**

28 Nuclear Factor 90 (NF90) is a novel virus sensor that serves to initiate antiviral innate  
29 immunity by triggering the stress granules (SGs) formation. However, the regulation of the  
30 NF90-SGs pathway remain largely unclear. We found that Tim-3, an immune checkpoint  
31 inhibitor, promotes the ubiquitination and degradation of NF90 and inhibits NF90-SGs  
32 mediated antiviral immunity. Vesicular Stomatitis Virus (VSV) infection induces the up-  
33 regulation and activation of Tim-3 in macrophages which in turn recruited the E3 ubiquitin  
34 ligase TRIM47 to the zinc finger domain of NF90 and initiated a proteasome-dependent  
35 degradation of the NF90 via K48-linked ubiquitination at Lys297. Targeted inactivation of  
36 the Tim-3 enhances the NF90 downstream SGs formation by selectively increasing the  
37 phosphorylation of PKR and eIF2a, the expression of SGs markers G3BP1 and TIA-1, and  
38 protected mice from lethal VSV challenge. These findings provide insights into the  
39 crosstalk between Tim-3 and other receptors in antiviral innate immunity and its related  
40 clinical significance.

41 **Key words:** Tim-3; NF90; ubiquitination; TRIM47; Stress granule

42

## 43 **Introduction**

44 Innate immunity is the first line of host defense against viral infection. Pattern recognition  
45 receptors (PRRs), including Toll-like receptors (TLRs) and RIG-I-like receptors (RLRs) are  
46 main sensors in defending virus infection(1). PRR-mediated downstream signaling  
47 pathways initiating an anti-viral innate immune response is the classic anti-virus infection  
48 model(2, 3). Recently studies have found that nuclear factor 90 (NF90), which is encoded  
49 by interleukin enhancer-binding factor-3, is a critical sensor for invading viruses(4-8). NF90  
50 is an evolutionarily conserved member of the dsRNA-binding protein family and is  
51 abundantly expressed in various mammalian cells(9, 10). As an important antiviral pathway,  
52 NF90 recognizes virus dsRNA and triggers the formation of stress granules (SGs), which  
53 is composed of cytoplasmic particles including ribonucleoproteins, RNA-binding proteins,  
54 and translation initiation factors(11). Unfortunately, a growing number of virus families  
55 modulate SG formation and function to maximize replication efficiency(12). Therefore, an  
56 understanding of the precise regulation mechanisms of NF90-SGs signaling for efficient  
57 viral clearance without harmful immunopathology is needed.

58 Upon sensing virus, NF90 induces the phosphorylation of double-stranded RNA  
59 (dsRNA)-activated kinase protein kinase R (PKR)(4, 7). Then SGs form following PKR-  
60 mediated phosphorylation and activation of the eukaryotic translation initiation factor 2 $\alpha$   
61 (eIF2 $\alpha$ ), which induces the expression of G3BP1(13) (Ras-GAP SH3-binding protein-1)  
62 and TIA-1 (T-cell intracellular antigen-1), two key markers in SGs. The activated eIF2 $\alpha$  co-  
63 operate with other components of SGs to block the virus mRNA translation. Despite acting  
64 as an important virus sensor and trigger of SG formation, how NF90 is regulated remains  
65 largely unknown.

66 Tim-3 is an immune checkpoint inhibitor which was first identified in activated T cells.  
67 Later Tim-3 was also found to be expressed in innate immune cells, such as dendritic cells  
68 and macrophages(14). Establishment of Tim-3 as an exhaustion marker in immune cells  
69 of both tumors and infectious diseases makes Tim-3 an attractive target for immunotherapy  
70 similar to PD-1(15)、CTLA-4(16), and Siglec-G (17). Recently, a report showed that  
71 increased Tim-3 expression on immune cells in patients with coronavirus disease (COVID-

72 19) is associated with an exhaustion phenotype(18). However, Tim-3 does not have an  
73 inhibitory motif within its tail(19), and the mechanism by which Tim-3 mediates inhibitory  
74 signaling remains largely unclear. Kuchroo VK and colleagues showed that CEACAM1 is  
75 a heterophilic ligand of Tim-3 and is required for Tim-3 to mediate T cell inhibition(15) and  
76 that Bat-3 acts as a safety catch, which blocks Tim-3-mediated inhibitory signals in T  
77 cells(17). Potentiating anti-infection immunity by inducing innate immune responses is a  
78 promising area of infection therapy. However, little is known about the Tim-3 signaling in  
79 innate immune cells.

80 Ubiquitination is one of the most versatile posttranslational modifications and is  
81 indispensable for antiviral infection(20). Increasing evidences suggests that ubiquitination  
82 play important roles in various cellular processes, including cell proliferation and antiviral  
83 innate signaling. Posttranslational modification of many signaling molecules, including  
84 TRAF3/6(21), RIG-I(1), MAVS(22), TBK1(23), IRF3/7(24, 25), and NLRP3(26) involved in  
85 TLRs, RLRs, and NLRs pathways by different types of ubiquitination play key roles in the  
86 regulation of antiviral innate immunity. However, whether NF90, a molecule containing a  
87 ubiquitin binding domain (domain associated with zinc fingers, DZF), undergoes  
88 ubiquitination remains unclear.

89 Here we found that Tim-3 was involved in innate immunity against VSV by promoting the  
90 proteasomal degradation of NF90 via the tripartite motif-containing protein 47 (TRIM47)-  
91 mediated conjugation of K48-linked ubiquitin. To the best of our knowledge, it is the first  
92 time demonstrating the ubiquitination as a new post translational modification mechanism  
93 of NF90. Our findings shed a new light on the Tim-3-mediated immune tolerance during  
94 infection.

95

96 **Results**

97 **Tim-3 interacts with and inhibits NF90.**

98 To test whether Tim-3 is involved in the innate immunity against virus, we challenged  
99 macrophages with Vesicular Stomatitis Virus, an RNA virus widely used for investigating  
100 anti-viral immunity in both mouse and human models (1). Shortly after VSV challenge, the  
101 expression of Tim-3 was upregulated in macrophages (Fig.1A&B). The phosphorylation of  
102 Tim-3, which account for the Tim-3 signaling(19), were also tested. There was a time-  
103 dependent enhancement of Tim-3 phosphorylation in HEK293T cells transfected with Tim-  
104 3 and challenged with VSV (Fig. 1C). To evaluate the role of the VSV activated Tim-3 in  
105 host antiviral innate immune response, macrophages from *Tim-3* knockout mice (*Tim-3*<sup>-/-</sup>  
106 mice) and from wildtype mice (*Tim-3*<sup>+/+</sup> mice) and the macrophage cell line RAW264.7 cells  
107 with a knockdown of Tim-3 (*si-Tim-3*) were challenged with VSV. Both knockout or  
108 knockdown Tim-3 in macrophages led to decreased VSV replication (Fig. 1D&E). These  
109 findings suggest a negative regulatory role of Tim-3 in anti-viral innate immunity.

110 To find the possible mechanisms of Tim-3 mediated anti-viral immunity, we used Tim-3  
111 pulldown and mass spectrometry to identify the proteins interacting with Tim-3. Among the  
112 candidates, NF90, an RNA-binding protein involved in anti-infection and anti-tumor  
113 immunity, received the highest score and the highest number of matched peptides  
114 (Supplemental Fig.1). To confirm the interaction between Tim-3 and NF90, HEK293T cells  
115 were co-transferred with NF90 and Tim-3, immunoprecipitation targeting either Tim-3 (Fig.  
116 2A) or NF90 (Fig. 2B) all confirmed the interaction between Tim-3 and NF90. The  
117 interaction sites of Tim-3 interacting with NF90 were subsequently examined. The results  
118 showed that 4Y/F mutant of Tim-3 (Y265F, Y272F, Y280F, Y281F) weakened the binding  
119 of Tim-3 with NF90. While deletion of the intracellular domain of Tim-3 ( $\Delta$ IC) lost the binding  
120 activity of Tim-3 with NF90 (Fig 2C&D). These data showed that Tim-3 interacts with NF90  
121 through its intracellular domain, in which Y265, Y272, Y280, and Y281 play an important  
122 role. We finally evaluated the effects of Tim-3 on NF90 expression. In HEK293T cells  
123 transfected with Tim-3 or in macrophages from Tim-3 transgenic mice (*Tim-3*-TG), the  
124 overexpression of Tim-3 decreased the expression of NF90 (Fig 2E). These results show

125 that Tim-3 interacts with and inhibits NF90.

### 126 **Tim-3 promotes the ubiquitination of NF90 at the DZF domain**

127 Ubiquitination is one of the most versatile posttranslational modifications and is  
128 indispensable for antiviral immunity. However, whether NF90 undergoes proteasomal  
129 degradation is totally unknown. To find the mechanisms by which Tim-3 inhibits NF90  
130 expression, we tested whether NF90 undergoes ubiquitination and if so, whether Tim-3 is  
131 involved. Macrophages isolated from wild type (WT) and Tim-3 transgenic mice (Tim-3-TG)  
132 were challenged by VSV for 4 hours and the ubiquitination of NF90 were examined.  
133 Interestingly, the ubiquitination of NF90 were significantly increased in macrophages from  
134 Tim-3-TG mice compare to those from wild type mice (Fig. 3A). When NF90, K48-Ub, or  
135 Tim-3 was transfected into HEK293T cells, NF90 underwent K48-linked ubiquitination,  
136 which can be enhanced by co-transfected Tim-3 (Fig. 3B). Following VSV challenge, the  
137 enhanced K48-linked ubiquitination of NF90 was also found in primary macrophages from  
138 Tim-3 transgenic mice compared to those from wild type mice (data not shown). The results  
139 suggested that Tim-3 may inhibit NF90 by enhancing the K48-linked ubiquitination and  
140 degradation of NF90. We then explored the domain of NF90 for ubiquitination using  
141 constructions encoding the DZF domain (domain associated with zinc fingers), full-length  
142 NF90 or NF90 lack of DZF domain ( $\Delta$ DZF) (Fig.3C) and found that the DZF domain of  
143 NF90 was dominantly ubiquitinated (Fig. 3D). Finally, when the plasmid of Tim-3 was co-  
144 transfected with different NF90 constructs, the data revealed that Tim-3 specially enhanced  
145 the ubiquitination of DZF (Fig. 3E). These results demonstrated that NF90 can be  
146 ubiquitinated at the DZF domain, and the process can be enhanced by Tim-3, suggesting  
147 that Tim-3 may suppress NF90 by promoting its ubiquitination and degradation.

### 148 **Involvement of TRIM-47 in Tim-3 -mediated degradation of NF90**

149 To find the possible E3 ligase accounting for Tim-3 mediated NF90 ubiquitination, NF90-  
150 interacting proteins were investigated by immunoprecipitating NF90 and then performing  
151 mass spectrometry. Among the NF90-interacting protein candidates, we identified three  
152 proteins with potential E3 ligases activities. TRIM47 had the highest Mascot scores and  
153 the highest number of matched peptides (Fig. 4A). Knockdown of TRIM47 with specific

154 siRNA (si-TRIM47) in macrophages increased the half-life of endogenous NF90 protein  
155 during VSV infection (Supplement Fig. 2). To confirm whether the TRIM47 promotes the  
156 proteasomal degradation of NF90, we transfected HEK293T cells with ubiquitin, NF90, and  
157 an increasing dose of TRIM47. TRIM47 induced degradation of NF90 in a dose-dependent  
158 manner which can be blocked in the presence of MG132, indicating a proteasomal  
159 dependent degradation (Fig. 4B). In addition, when *Tim-3* was co-transfected, it dose-  
160 dependently enhanced TRIM47-mediated degradation of NF90 (Fig. 4C).

161 We then explored the possible interaction between Tim-3 and TRIM47. VSV challenge  
162 led to decreased TRIM47 expression in *Tim-3<sup>-/-</sup>* cells compared with that in *Tim-3<sup>+/+</sup>* cells  
163 (Fig. 4D), and increased TRIM47 expression in Tim-3 transgenic mice-derived  
164 macrophages compared with that in control cells (Fig. 4E). These results showed that Tim-  
165 3 promotes the expression of TRIM47 in the presence of virus. The possible mechanism  
166 by which Tim-3 enhances TRIM-47 expression was primarily investigated. We examined  
167 whether TRIM-47 undergoes ubiquitination when Tim-3 is overexpressed, as TRIM25, an  
168 E3 ligase with a structure similar to TRIM-47, undergoes ubiquitination during viral  
169 infection(27, 28). Interestingly, when the genes encoding TRIM47, Tim-3, and Ub-K63 were  
170 co-transfected into HEK-293T cells, TRIM47 underwent ubiquitination, and Tim-3  
171 enhanced this progress (Fig. 4F). However, the relationship between Tim-3 enhanced  
172 TRIM47 expression and Tim-3 enhanced TRIM47 ubiquitination remains to be determined.  
173 These results showed the involvement of TRIM47 in Tim-3 mediated degradation of NF90.

#### 174 **Tim-3 recruits TRIM-47 to the DZF domain of NF90 and Lys297 within DZF is a Critical** 175 **Site for TRIM47-Mediated K48-Linked Ubiquitination of NF90**

176 To find whether Tim-3 and TRIM-47 interacts with each other to act on NF90, we first  
177 examined the interactions among Tim-3, TRIM47, and NF90. Different Tim-3 constructs  
178 (Fig.5A) or different NF90 constructs (Fig.5B) were co-transfected with TRIM-47 into  
179 HEK293T cells. The immunoprecipitation assay showed that TRIM-47 interacted with the  
180 intracellular domain of Tim-3, and interacts with the DZF domain of NF90. These data  
181 suggest that Tim-3 recruits TRIM47 to the DZF domain via its intracellular domain where  
182 forming a complex of TRIM47 and NF90.

183 To confirm that Tim-3 co-operates with TRIM47 to enhance the ubiquitination and  
184 degradation of NF90, we co-transfected Tim-3, TRIM47, and ubiquitin into HEK293T cells  
185 and examined the effects of TRIM47 and Tim-3 on the ubiquitination of NF90.  
186 Overexpression of TRIM47 promotes the ubiquitination of NF90, and that this process was  
187 enhanced when Tim-3 was co-transfected (Fig. 5C). Next, we examined the ubiquitin  
188 modification site within the DZF domain of NF90 by site mutation. NF90 contains eighteen  
189 Lysine residues in its DZF domain. Immunoprecipitation analysis revealed that TRIM47  
190 enhanced the ubiquitination of wildtype DZF and DZF with the K100R, K117/119R, K127R,  
191 K143R, K158R, and K224R but not K297R mutants in HEK293T cells (Supplemental Fig.3).  
192 We further demonstrated that only mutations of the arginine at K297R completely blocked  
193 the TRIM47-mediated ubiquitination and degradation of NF90 via a K48-mediated linkage  
194 (Fig. 5D). In addition, when co-transfected K48-Ub, Tim-3, wildtype NF90, DZF domain, or  
195 DZF K297R with increased doses of TRIM47, we found that TRIM47 dose-dependently  
196 induced the degradation of NF90 DZF domain but not for DZF K297R (Fig. 5E). Taken  
197 together, these data suggest that K297 is the critical residue for the ubiquitination of NF90-  
198 DZF targeted by TRIM47.

### 199 ***Tim-3* Deficiency Enhances the Formation of SGs and Protects Mice from VSV** 200 **Infection**

201 Finally, the significance of Tim-3 inhibits NF90 was investigated. As NF90 triggers the  
202 formation of SGs, we first examined whether Tim-3 regulates the down-stream of NF90-  
203 SGs pathway. Peritoneal macrophages were isolated from wildtype and Tim-3 knock out  
204 (*Tim-3<sup>-/-</sup>*) mice and following VSV challenge for 2-8 hours, the expression of NF90 and the  
205 phosphorylation of PKR, eIF2 $\alpha$ , as well as the phosphorylation of other signaling cascade  
206 including ERK and P38 were examined. The data in Fig.6A showed that the expression of  
207 NF90 and the phosphorylation of eIF2 $\alpha$  and PKR was dramatically increased in  
208 macrophages from *Tim-3<sup>-/-</sup>* mice compared with that in cells from *Tim-3<sup>+/+</sup>* mice. There was  
209 no difference in p38 and ERK phosphorylation between *Tim-3<sup>-/-</sup>* and *Tim-3<sup>+/+</sup>* cells.  
210 Meanwhile, the expression of G3BP1 and TIA-1, two markers of SGs were also examined  
211 in above macrophages. The results in Fig.6B showed that Tim-3 knock out significantly



212 increased the expression of G3BP1 and TIA-1 in macrophages following VSV challenges  
213 in vitro. To test the effects of Tim-3 inhibition on NF90-SGS pathway in vivo, a VSV  
214 infection model were established in mice. We found that the expression of SG markers:  
215 G3BP1 and TIA-1, and VSV replication were significantly higher in spleen, lung, and  
216 peritoneal macrophages from *Tim-3<sup>-/-</sup>* mice than those in *Tim-3<sup>+/+</sup>* mice (Fig 7A-7I). And  
217 lethal VSV infections lead to an increased survival rate in *Tim-3<sup>-/-</sup>* mice compared to *Tim-*  
218 *3<sup>+/+</sup>* mice (Fig. 7J) and a less severe tissue inflammation (Fig. 7K). These data showed that  
219 Tim-3 deficiency enhances the formation of SGs in vivo and protects mice from VSV. Finally,  
220 we also examined whether the silence of TRIM-47 affects the assembly of SGs and the  
221 anti-viral immunity of macrophages. The data showed that silence of TRIM-47 with specific  
222 siRNA in RAW264.7 led to increased G3BP1 and TIA-1 expression and decreased virus  
223 load following VSV infection (Supplement Fig. 4), further confirming that TRIM47 acts as  
224 an up-stream regulator of the NF90-SG antiviral pathway.

225 The mechanisms by which Tim-3 promotes the TRIM47-mediated ubiquitination and  
226 proteasomal degradation of NF90 in viral immune evasion are summarized in Fig. 8. Upon  
227 VSV infection, Tim-3 is activated and upregulated. The activation of Tim-3 in turn recruited  
228 the E3 ubiquitin ligase TRIM47 to the zinc finger domain of NF90 and initiated the  
229 proteasome-dependent degradation of the NF90 via K48-linked ubiquitination at Lys297.  
230 The negative regulation of NF90 by Tim-3 blocked the virus triggered and NF-90-SGs  
231 mediated antiviral immunity, and finally led to virus immune evasion.

## 232 **Discussion**

233 Viruses have developed many different strategies of immune evasion, for example by  
234 downregulating or degrading virus sensors. The mechanisms by which these receptors are  
235 regulated are widely investigated in hopes of developing effective treatments. NF90 was  
236 found to play an important role in host innate immunity against various virus infections  
237 However, the regulation of NF90 under physio-pathological conditions remains largely  
238 unclear. Here we identified a novel negative regulation mechanism of NF90, which could  
239 be employed by VSV to evade the immune attack. The VSV activated Tim-3 in turn  
240 promotes the ubiquitination and degradation of NF90, and subsequently inhibits the

241 formation and the antiviral activity of down-stream SGs. To our best knowledge, this is the  
242 first report showing that NF90 undergoes ubiquitination and also the critical domain (DZF)  
243 and critical site (Lys297) of NF90 for Tim-3 and E3 ligase TRIM47 mediated ubiquitination  
244 and degradation.

245 NF90, like the classical PRRs, is considered a novel virus sensor, exerting an important  
246 role in host innate immunity against various viral infections, especially negative-sense  
247 single-stranded RNA virus(4, 6, 7). One report showed that NF90 is required for an efficient  
248 response against VSV infection(8), but the underlying have not been clarified. Other report  
249 showed that NF90 interacted with the VP35 protein of Ebola virus and inhibited EBOV  
250 infection through impairing the function of the EBOV transcription/replication complex(5).  
251 Knockdown of NF90 in indicated cells dramatically promote EBOV and influenza virus  
252 replication, while overexpression of NF90 inhibits or impacts replication of these viruses(4-  
253 6). When the signaling cascades are investigated, SGs, not the interferon pathway, serve  
254 as the downstream signaling cascade of the NF90 antiviral pathway (5,8). NF90  
255 promotes(29) the assemblage of SG and synergizes with other proteins to exert antiviral  
256 immunity(7). These reports support our findings that NF90 inhibits VSV replication via SGs  
257 and further demonstrates the critical role of the NF90-SG signaling pathway during an  
258 antiviral immune response.

259 Tim-3 is an immune checkpoint inhibitor that was initially found to be expressed on  
260 activated Th1 cells by binding with its ligand Gal-9(30, 31).Tim-3 induces apoptosis and T  
261 cell tolerance(32, 33). Most investigations focus on the roles of Tim-3 in maintaining T cell  
262 exhaustion in immune disorders, tumors, or infectious diseases, which means that this  
263 checkpoint inhibitor could be abused. Recently our works and other published data focus  
264 on the roles of Tim-3 in maintaining the homeostasis of innate immune cells and  
265 demonstrated that the dysregulated Tim-3 on innate immune cells also contribute to the  
266 immune evasion of many tumors or pathogens(18, 34) . Innate immune cells have now  
267 attached much attention for developing new therapeutic strategies against infectious or  
268 tumors diseases, in which innate immune cells expressed immune checkpoint inhibitors  
269 are potential targets (14). Here we found that Tim-3 suppresses the macrophage-

270 mediated antiviral immune response, suggesting that it is a potent therapeutic target for re-  
271 boosting innate immunity against virus. However, as Tim-3 does not possess an obviously  
272 classical ITIM motif compared with other immune-checkpoint receptors, such as PD-1,  
273 CTLA-4(35), and Siglec-G(1), the mechanism in which Tim-3 mediates inhibitory signals  
274 remain unclear. Kuchroo and colleagues(15) showed that Tim-3 induces T cell exhaustion  
275 via BAT and using CEACAM1 as a coreceptor, and our findings showed that Tim-3  
276 promotes tumor-prone macrophage polarization by binding to and suppressing the  
277 phosphorylation and nuclear translocation of STAT1(34). Further, Tim-3 inhibits TLR4-  
278 mediated macrophage activation during sepsis by suppressing NF-kB activation(36). How  
279 Tim-3 works during anti-viral innate immunity remain unclear. The intracellular tail of Tim-3  
280 contains a highly conserved tyrosine- containing src homology 2 (SH2)-binding motif, and  
281 tyrosine residues within this motif can be phosphorylated, which is critical for Tim-3  
282 signaling in T cells(1). In this study, we identified an increased tyrosine phosphorylation of  
283 Tim-3 in macrophages following VSV infection. We also demonstrated that deletion of Tim-  
284 3 tail or mutation of the conserved tyrosines, including Tyr265, Tyr272, Tyr280, and Try281,  
285 within Tim-3 tail significantly attenuated the interaction between Tim-3 and NF90. These  
286 data demonstrated a new mechanism by which Tim-3 transduces inhibitory signal in anti-  
287 viral innate immune responses.

288 Ubiquitination is one of the most versatile posttranslational modifications for substrates  
289 and is indispensable for antiviral infection(37) However, whether NF90 undergoes  
290 ubiquitination is totally unknown. Structurally, NF90 possess a domain associated with zinc  
291 fingers (DZF) in the N-terminal region, which is a symbol of ubiquitination for  
292 substrates(38) . Here we verified our hypothesis and demonstrated that NF90 can be  
293 ubiquitinated, a process that is enhanced by Tim-3 in macrophages following VSV infection.  
294 As speculated, Tim-3 mainly promotes the ubiquitination of the DZF domain of NF90. To  
295 our best knowledge, this is the first report demonstrating that NF90 undergoes  
296 ubiquitination. Further, we also found that Lys297, a highly conserved residue among  
297 different isoforms of NF90, plays a critical role in the K-48 linked ubiquitination of NF90.

298 When the candidates accounting for NF90 ubiquitination were examined, we focus on

299 TRIM47 as it got the highest scores and the highest number of matched peptides among  
300 NF90-interacting proteins, and structurally, TRIM47 contains a RING finger domain in the  
301 N-terminus, which may contribute to ubiquitin modification(38). In addition, TRIM family  
302 proteins play important roles in many biological processes, such as cell cycle regulation,  
303 and viral response(25). As discussed above, the conserved tyrosines within the Tim-3 tail  
304 could form a SH2 (SRC homology 2) binding domain(17, 19, 34, 39). We posit that Tim-3  
305 may recruit TRIM47 using its SH2 binding domain as the tyrosines are phosphorylated  
306 following VSV infection. A recent report showing that Siglec-G triggers downstream  
307 signaling by recruiting SHP-2(1) supports this hypothesis. Interestingly, our data showed  
308 that Tim-3 enhances the expression and ubiquitination of TRIM47. This is also the first  
309 report showing the ubiquitination modification of TRIM47. However, the mechanisms of  
310 Tim-3 enhanced TRIM47 ubiquitination and whether the enhanced ubiquitination of  
311 TRIM47 by Tim-3 accounts for the increased TRIM47 expression remain to be determined.

312 In summary, we have verified that Tim-3 is specifically upregulated following VSV  
313 infection and inhibits NF90 signaling pathway in macrophages. Intracellularly, Tim-3  
314 promotes TRIM47 mediated ubiquitination and degradation of NF90. In VSV infected  
315 models, Tim-3 signaling inhibits the formation and the activity of the NF90 downstream  
316 SGs. To the best of our knowledge, this is the first report demonstrating the ubiquitination  
317 modification of NF90. These findings provide a novel mechanism of Tim-3-mediated  
318 infection tolerance which with implication in antiviral applications.

319

## 320 **Materials and Methods**

### 321 **Mice**

322 The Tim-3-TG mice were produced and fed as described previously(34). The Tim-3-  
323 flox/flox (*Tim-3<sup>+/+</sup>*) mice (C57BL/6) used in this study were generated in the Transgenic  
324 Core Facility of Cyagen Biosciences Inc., Guangzhou, China. EII-cre knock-in mice  
325 (C57BL/6) were a gift from Dr. Haitao Wu (Institute of Military cognition and Brain Sciences,  
326 Beijing, China). *Tim-3<sup>-/-</sup>*(*Tim-3<sup>fl/fl</sup>* EII<sup>cre/+</sup>) mice (C57BL/6) were generated by mating Tim-3-  
327 flox with EII-cre mice. And the genotype of *Tim-3<sup>-/-</sup>* mice (*Havcr2*) was detected with a

328 primer set as mHavcr2-Forward: 5'-CCAATTGGGTTCTACTATAAAGCCTTG-3' and  
329 mHavcr2-Reverse1: 5'-AAGTTGAGAGTTCTGGGATTACAGG-3' and mHavcr2-Reverse2:  
330 5'-ATACTTGCTTCAGTGGCTCGCGA-3' (Supplemental Fig.S5). Wildtype C57BL/6 mice  
331 and the aforementioned Tim-3-TG and *Tim-3*<sup>-/-</sup> mice were bred in specific pathogen-free  
332 conditions. The protocol was approved by the Ethics Committee of Animal Experiments of  
333 the Beijing Institute of Brain Sciences. All efforts were made to minimize suffering. Major  
334 procedures were blinded.

### 335 **Cells and Reagents**

336 The RAW264.7 and HEK293T cell lines (ATCC) were maintained in DMEM (Gibco)  
337 supplemented with 10% FBS (Gibco). Peritoneal macrophages were prepared as  
338 described(40). For stable transfection NC shRNA or Tim-3 shRNA, RAW264.7  
339 macrophages were transfected with Lipofectamine 2000 reagents (Invitrogen, 11668019)  
340 and then selected with 1,000 ng/mL G418 (Invitrogen, 10131027), which were purchased  
341 from Invitrogen. Vesicular stomatitis virus (VSV) was obtained and cultivated as  
342 described(1, 34). MG132 was purchased from Selleckchem (S2619) and used at a final  
343 concentration of 20  $\mu$ M.

### 344 **Plasmids and Antibodies**

345 The flag-tagged full-length NF90, NF90 mutation plasmids (NF90-DZF and NF90- $\Delta$ DZF),  
346 V5-tagged full-length NF90, as well as HA-tagged ubiquitin were constructed into  
347 eukaryotic pcDNA3.1 (+) -Flag and pcDNA3.1 (+) -V5 eukaryotic expression vector,  
348 respectively. Recombinant vectors encoding WT or mutant human-specific Tim-3 were  
349 constructed by PCR-based amplification of cDNA from human U937 cells and then  
350 subcloned into the eukaryotic pcDNA3.1 (+) eukaryotic expression vectors, with Flag, Myc  
351 and HA tags, respectively. Full-length NF90-GFP and full-length Tim-3-RFP fluorescence  
352 plasmids were cloned into PEGFP1-N1 and PDsRed1-N1 eukaryotic expression vectors,  
353 respectively. TRIM47 full-length for V5-tag plasmids were constructed into the pcDNA3.1  
354 (+) -V5 eukaryotic expression vector. Antibodies to Tim-3 (D3M9R, mouse-specific), Tim-3  
355 (D5D5R, human-specific), eIF2 $\alpha$  (D7D3), p-eIF2 $\alpha$  (D9G8), Ub-K48 (D9D5), P38 (8690), p-  
356 P38 (9215), ERK (4348), and p-ERK (8544) were obtained from Cell Signaling Technology.

357 An antibody to p-PKR (GTX32348) was purchased from GeneTex. Antibodies to  $\beta$ -Actin,  
358 anti-Flag-Tag (CW0287), anti-HA-Tag (CW0092), anti-V5-Tag (CW0094), and anti-RFP  
359 (CW0253) were from purchased from CWBIO (China). Antibodies to anti-V5-Tag (ab9116)  
360 and Anti-HA-Tag (ab9110) for immunoprecipitation were obtained from Abcam. Antibodies  
361 to Anti-Flag-tag (F1804) for immunoprecipitation were obtained from SIGMA. Antibodies to  
362 Ub (ab7780), ILF3/(NF90) (ab92355), and PKR (ab184257) were obtained from Abcam.  
363 The antibody to TRIM47 (BC017299) was obtained from Thermo (PA5-50892), and the  
364 antibody to Tim-3 (A2516) for western Blot was obtained from Abclonal.

### 365 **Western Blot Analysis**

366 Western blots were performed as described previously(36). Briefly, cells were lysed with  
367 lysis buffer (1% Triton X 100, 20 mM Tris-HCl pH 8.0, 250 mM NaCl, 3 mM EDTA pH 8.0),  
368 3 mM EGTA (pH 8.0) with the pH adjusted to 7.6, and complete protease inhibitor cocktail  
369 (Roche, pH 7.5) on ice for 30 min. Lysates were eluted by boiling 10 min with 5 X sample  
370 buffer (100 mM Tris-HCl, pH 6.8, 2% SDS, 10% glycerol, 0.1% bromophenol blue, 1%  $\beta$ -  
371 mercaptoethanol) and were separated by 10% SDS/PAGE, followed by examination of  
372 expression levels of the indicated proteins: phospho-eIF2 $\alpha$ , eIF2 $\alpha$ , phospho-PKR, PKR,  
373 total protein of NF90, and the levels of phospho-ERK, and phospho-p38.  $\beta$ -Actin served  
374 as an internal control.

### 375 **Co-Immunoprecipitation**

376 Cells were collected 24 h after transfection and lysed in lysis buffer (1% NP-40, 20 mM  
377 Tris-HCl, 150 mM NaCl, 5mM EDTA, 1mM Na<sub>3</sub>VO<sub>4</sub>, 0.25% sodium deoxycholic acid and  
378 complete protease inhibitor cocktail (Roche), pH 7.5) on ice for 30 min. After centrifugation  
379 for 15 min at 12 000 r (11800  $\times$  g) , 4°C, the supernatants were collected and incubated  
380 with Protein A / G Sepharose beads (SC-2003, Santa Cruz) coupled to specific antibodies  
381 overnight at 4 °C. The next day, beads were washed three times with high salt wash buffer  
382 (1% Triton  $\times$  100, 20 mM Tris-HCl, 500 mM NaCl, 10% Glycerol, 2 mM EDTA, 1 mM  
383 Na<sub>3</sub>VO<sub>4</sub>, and complete protease inhibitor cocktail (Roche), pH 7.5) and three times with  
384 low salt wash buffer (1% Triton  $\times$  100, 20 mM Tris-HCl, 150 mM NaCl, 10% Glycerol, 2 mM  
385 EDTA, 1 mM Na<sub>3</sub>VO<sub>4</sub>, and complete protease inhibitor cocktail (Roche), pH 7.5),

386 respectively. Lysates were eluted by boiling 10 min with 5X sample buffer (as indicated).  
387 Precipitates were fractionated by SDS/PAGE with appropriate concentration and western  
388 Blot was performed as described above.

### 389 **Ubiquitination assays**

390 For analysis of the ubiquitination of NF90 in HEK293T cells, plasmids encoding Flag-  
391 NF90, HA-Ub-K48 were transfected into HEK293T cells for 24 h and were treated with  
392 MG132 (20  $\mu$ M) for 6 h before harvesting. Cells were lysed with IP lysis buffer (1% NP-40,  
393 20 mM Tris-HCl, 150 mM NaCl, 5 mM EDTA, 1 mM  $\text{Na}_3\text{VO}_4$ , 0.5% sodium deoxycholic  
394 acid, and complete protease inhibitor cocktail (Roche), pH 7.5), and then the whole-cell  
395 lysates were immunoprecipitated with an antibody to Flag tag (F1804), followed by analysis  
396 of ubiquitination of NF90 with an antibody to HA tag. Precipitates were fractionated by  
397 SDS/PAGE with appropriate concentration (as indicated).

### 398 **Pathology and Survival assays**

399 Survival of ~6-week-old wildtype (*Tim-3<sup>+/+</sup>*) and *Tim-3* knock out (*Tim-3<sup>-/-</sup>*) mice were  
400 given intraperitoneal injection with VSV ( $1 \times 10^8$  pfu/g) (n = 9 per group). To detect the  
401 pathology of *Tim-3<sup>+/+</sup>* and *Tim-3<sup>-/-</sup>* mice in response to VSV, the hematoxylin and eosin  
402 staining of lung sections were examined 24 h after infecting.

### 403 **Mass spectrometry**

404 Plasmid encoding full-length *Tim-3* were transfected into HEK293T cells for 24 h, and  
405 cell lysates were immunoprecipitated with an antibody to *Tim-3* (D5D5R #45208). Mass  
406 spectrometry was used to identify *Tim-3*-interacting proteins.

### 407 **Q-PCR and RNAi knockdown**

408 Gene expression was analyzed by three-step q-RT-PCR (qPCR). Total RNA was  
409 extracted from mouse macrophages using TRI reagent (Sigma). Following the  
410 manufacturer's instructions RNA was reverse-transcribed in a 20  $\mu$ l reaction volume (42°C,  
411 30 min; 95°C, 5 min) using a QuantiTect Reverse Transcription Kit (Qiagen, Valencia, CA,  
412 USA). cDNA was then amplified using a SYBR Green I Master mix (Roche, Basel,  
413 Switzerland) and a Light Cycler 480 PCR system (Roche). All tests were carried out on  
414 duplicate reaction mixtures in 96-well plates. The relative expression of the gene of interest

415 was determined using the  $2^{-\Delta\Delta C_t}$  method, with 18S ribosomal mRNA (18S) as the internal  
416 control. The primers used for qPCR are listed in Supplemental Figure 1.

#### 417 **Statistical Analysis**

418 The significance of difference between groups was determined by two-tailed Student's  
419 t-test and two-way analysis of variance test. For the mouse survival study, Kaplan–Meier  
420 survival curves were generated and analyzed for statistical significance with GraphPad  
421 Prism 6.0. *P*-values < 0.05 were considered statistically significant.

422



423 **Acknowledgments**

424 We thank Prof. Minghong Jiang, Institute of Basic Medical Sciences, Peking Union Medical  
425 College, Chinese Academy of Medical Sciences, Beijing, China, for critical reading.

426 **Disclosures**

427 The authors have no financial conflicts of interest.

428 **Author Contributions**

429 **Conceptualization:** Gencheng Han

430 **Data Curation:** Gencheng Han; Shuaijie Dou

431 **Formal Analysis:** Renxi Wang; Yang Zheng

432 **Investigation:** Shuaijie Dou; Ge Li

433 **Methodology:** Shuaijie Dou; Guoxian Li

434 **Project Administration:** Gencheng Han

435 **Resources:** Lili Tang; Yang Gao; Rongliang Mo; Beifen Shen;

436 **Software:** Ge Li; Chunmei Hou, Yuxiang Li;

437 **Supervision:** Chunmei Hou

438 **Validation:** Guoxian Li; Ge Li;

439 **Visualization:** Jun Zhang

440 **Writing – Original Draft Preparation:** Shuaijie Dou; Jun Zhang

441 **Writing – Review & Editing:** Gencheng Han

442

443 **References**

- 444 1. W. Chen, C. Han, B. Xie, X. Hu, Q. Yu, L. Shi, Q. Wang, D. Li, J. Wang, P. Zheng, Y. Liu, X.  
445 Cao, Induction of Siglec-G by RNA viruses inhibits the innate immune response by  
446 promoting RIG-I degradation. *Cell* **152**, 467-478 (2013).
- 447 2. R. Barbalat, S. E. Ewald, M. L. Mouchess, G. M. Barton, Nucleic acid recognition by the  
448 innate immune system. *Annu Rev Immunol* **29**, 185-214 (2011).
- 449 3. M. J. McFadden, N. S. Gokhale, S. M. Horner, Protect this house: cytosolic sensing of  
450 viruses. *Curr Opin Virol* **22**, 36-43 (2017).
- 451 4. T. Li, X. Li, W. Zhu, H. Wang, L. Mei, S. Wu, X. Lin, X. Han, NF90 is a novel influenza A virus  
452 NS1-interacting protein that antagonizes the inhibitory role of NS1 on PKR  
453 phosphorylation. *FEBS Lett* **590**, 2797-2810 (2016).
- 454 5. R. S. Shabman, D. W. Leung, J. Johnson, N. Glennon, E. E. Gulcicek, K. L. Stone, L. Leung,  
455 L. Hensley, G. K. Amarasinghe, C. F. Basler, DRBP76 associates with Ebola virus VP35 and  
456 suppresses viral polymerase function. *J Infect Dis* **204 Suppl 3**, S911-918 (2011).
- 457 6. P. Wang, W. Song, B. W. Mok, P. Zhao, K. Qin, A. Lai, G. J. Smith, J. Zhang, T. Lin, Y. Guan,  
458 H. Chen, Nuclear factor 90 negatively regulates influenza virus replication by interacting  
459 with viral nucleoprotein. *Journal of virology* **83**, 7850-7861 (2009).
- 460 7. X. Wen, X. Huang, B. W. Mok, Y. Chen, M. Zheng, S. Y. Lau, P. Wang, W. Song, D. Y. Jin, K.  
461 Y. Yuen, H. Chen, NF90 exerts antiviral activity through regulation of PKR phosphorylation  
462 and stress granules in infected cells. *Journal of immunology* **192**, 3753-3764 (2014).
- 463 8. I. Pfeifer, R. Elsby, M. Fernandez, P. A. Faria, D. R. Nussenzweig, I. S. Lossos, B. M. Fontoura,  
464 W. D. Martin, G. N. Barber, NFAR-1 and -2 modulate translation and are required for  
465 efficient host defense. *Proceedings of the National Academy of Sciences of the United*  
466 *States of America* **105**, 4173-4178 (2008).
- 467 9. C. Patino, A. L. Haenni, S. Urcuqui-Inchima, NF90 isoforms, a new family of cellular  
468 proteins involved in viral replication? *Biochimie* **108**, 20-24 (2015).
- 469 10. K. Masuda, Y. Kuwano, K. Nishida, K. Rokutan, I. Imoto, NF90 in posttranscriptional gene  
470 regulation and microRNA biogenesis. *International journal of molecular sciences* **14**,  
471 17111-17121 (2013).
- 472 11. L. Shi, W. R. Godfrey, J. Lin, G. Zhao, P. N. Kao, NF90 regulates inducible IL-2 gene  
473 expression in T cells. *The Journal of experimental medicine* **204**, 971-977 (2007).
- 474 12. J. P. White, R. E. Lloyd, Regulation of stress granules in virus systems. *Trends Microbiol* **20**,  
475 175-183 (2012).
- 476 13. W. C. Tsai, L. C. Reineke, A. Jain, S. Y. Jung, R. E. Lloyd, Histone arginine demethylase  
477 JMJD6 is linked to stress granule assembly through demethylation of the stress granule-  
478 nucleating protein G3BP1. *The Journal of biological chemistry* **292**, 18886-18896 (2017).
- 479 14. G. Han, G. Chen, B. Shen, Y. Li, Tim-3: an activation marker and activation limiter of innate  
480 immune cells. *Frontiers in immunology* **4**, 449 (2013).
- 481 15. Y. H. Huang, C. Zhu, Y. Kondo, A. C. Anderson, A. Gandhi, A. Russell, S. K. Dougan, B. S.  
482 Petersen, E. Melum, T. Pertel, K. L. Clayton, M. Raab, Q. Chen, N. Beauchemin, P. J. Yazaki,  
483 M. Pyzik, M. A. Ostrowski, J. N. Glickman, C. E. Rudd, H. L. Ploegh, A. Franke, G. A. Petsko,  
484 V. K. Kuchroo, R. S. Blumberg, CEACAM1 regulates TIM-3-mediated tolerance and  
485 exhaustion. *Nature* **517**, 386-390 (2015).
- 486 16. C. C. Stamper, Y. Zhang, J. F. Tobin, D. V. Erbe, S. Ikemizu, S. J. Davis, M. L. Stahl, J. Sehra,

- 487 W. S. Somers, L. Mosyak, Crystal structure of the B7-1/CTLA-4 complex that inhibits  
488 human immune responses. *Nature* **410**, 608-611 (2001).
- 489 17. M. Rangachari, C. Zhu, K. Sakuishi, S. Xiao, J. Karman, A. Chen, M. Angin, A. Wakeham, E.  
490 A. Greenfield, R. A. Sobel, H. Okada, P. J. McKinnon, T. W. Mak, M. M. Addo, A. C. Anderson,  
491 V. K. Kuchroo, Bat3 promotes T cell responses and autoimmunity by repressing Tim-3-  
492 mediated cell death and exhaustion. *Nature medicine* **18**, 1394-1400 (2012).
- 493 18. B. Diao, C. Wang, Y. Tan, X. Chen, Y. Liu, L. Ning, L. Chen, M. Li, Y. Liu, G. Wang, Z. Yuan,  
494 Z. Feng, Y. Zhang, Y. Wu, Y. Chen, Reduction and Functional Exhaustion of T Cells in  
495 Patients With Coronavirus Disease 2019 (COVID-19). *Frontiers in immunology* **11**, 827  
496 (2020).
- 497 19. P. S. van de Weyer, M. Muehlfeit, C. Klose, J. V. Bonventre, G. Walz, E. W. Kuehn, A highly  
498 conserved tyrosine of Tim-3 is phosphorylated upon stimulation by its ligand galectin-9.  
499 *Biochemical and biophysical research communications* **351**, 571-576 (2006).
- 500 20. S. M. Heaton, N. A. Borg, V. M. Dixit, Ubiquitin in the activation and attenuation of innate  
501 antiviral immunity. *The Journal of experimental medicine* **213**, 1-13 (2016).
- 502 21. H. W. Chen, Y. K. Yang, H. Xu, W. W. Yang, Z. H. Zhai, D. Y. Chen, Ring finger protein 166  
503 potentiates RNA virus-induced interferon-beta production via enhancing the  
504 ubiquitination of TRAF3 and TRAF6. *Scientific reports* **5**, 14770 (2015).
- 505 22. B. Liu, M. Zhang, H. Chu, H. Zhang, H. Wu, G. Song, P. Wang, K. Zhao, J. Hou, X. Wang, L.  
506 Zhang, C. Gao, The ubiquitin E3 ligase TRIM31 promotes aggregation and activation of  
507 the signaling adaptor MAVS through Lys63-linked polyubiquitination. *Nature*  
508 *immunology* **18**, 214-224 (2017).
- 509 23. G. Song, B. Liu, Z. Li, H. Wu, P. Wang, K. Zhao, G. Jiang, L. Zhang, C. Gao, E3 ubiquitin  
510 ligase RNF128 promotes innate antiviral immunity through K63-linked ubiquitination of  
511 TBK1. *Nature immunology* **17**, 1342-1351 (2016).
- 512 24. Y. Yu, G. S. Hayward, The ubiquitin E3 ligase RAUL negatively regulates type I interferon  
513 through ubiquitination of the transcription factors IRF7 and IRF3. *Immunity* **33**, 863-877  
514 (2010).
- 515 25. P. Wang, W. Zhao, K. Zhao, L. Zhang, C. Gao, TRIM26 negatively regulates interferon-beta  
516 production and antiviral response through polyubiquitination and degradation of nuclear  
517 IRF3. *PLoS Pathog* **11**, e1004726 (2015).
- 518 26. H. Song, B. Liu, W. Huai, Z. Yu, W. Wang, J. Zhao, L. Han, G. Jiang, L. Zhang, C. Gao, W.  
519 Zhao, The E3 ubiquitin ligase TRIM31 attenuates NLRP3 inflammasome activation by  
520 promoting proteasomal degradation of NLRP3. *Nature communications* **7**, 13727 (2016).
- 521 27. S. Nisole, J. P. Stoye, A. Saib, TRIM family proteins: retroviral restriction and antiviral  
522 defence. *Nat Rev Microbiol* **3**, 799-808 (2005).
- 523 28. E. K. Pauli, Y. K. Chan, M. E. Davis, S. Gableske, M. K. Wang, K. F. Feister, M. U. Gack, The  
524 ubiquitin-specific protease USP15 promotes RIG-I-mediated antiviral signaling by  
525 deubiquitylating TRIM25. *Science signaling* **7**, ra3 (2014).
- 526 29. E. Meunier, M. S. Dick, R. F. Dreier, N. Schurmann, D. Kenzelmann Broz, S. Warming, M.  
527 Roose-Girma, D. Bumann, N. Kayagaki, K. Takeda, M. Yamamoto, P. Broz, Caspase-11  
528 activation requires lysis of pathogen-containing vacuoles by IFN-induced GTPases.  
529 *Nature* **509**, 366-370 (2014).
- 530 30. F. C. Chou, S. J. Shieh, H. K. Sytwu, Attenuation of Th1 response through galectin-9 and

- 531 T-cell Ig mucin 3 interaction inhibits autoimmune diabetes in NOD mice. *European journal*  
532 *of immunology* **39**, 2403-2411 (2009).
- 533 31. V. Dardalhon, A. C. Anderson, J. Karman, L. Apetoh, R. Chandwaskar, D. H. Lee, M. Cornejo,  
534 N. Nishi, A. Yamauchi, F. J. Quintana, R. A. Sobel, M. Hirashima, V. K. Kuchroo, Tim-  
535 3/galectin-9 pathway: regulation of Th1 immunity through promotion of CD11b+Ly-6G+  
536 myeloid cells. *Journal of immunology* **185**, 1383-1392 (2010).
- 537 32. M. Nakayama, H. Akiba, K. Takeda, Y. Kojima, M. Hashiguchi, M. Azuma, H. Yagita, K.  
538 Okumura, Tim-3 mediates phagocytosis of apoptotic cells and cross-presentation. *Blood*  
539 **113**, 3821-3830 (2009).
- 540 33. B. Sarraj, J. Ye, A. I. Akl, G. Chen, J. J. Wang, Z. Zhang, F. Abadja, M. Abecassis, S. D. Miller,  
541 G. S. Kansas, M. J. Ansari, Impaired selectin-dependent leukocyte recruitment induces T-  
542 cell exhaustion and prevents chronic allograft vasculopathy and rejection. *Proceedings of*  
543 *the National Academy of Sciences of the United States of America* **111**, 12145-12150  
544 (2014).
- 545 34. X. Jiang, T. Zhou, Y. Xiao, J. Yu, S. Dou, G. Chen, R. Wang, H. Xiao, C. Hou, W. Wang, Q.  
546 Shi, J. Feng, Y. Ma, B. Shen, Y. Li, G. Han, Tim-3 promotes tumor-promoting M2  
547 macrophage polarization by binding to STAT1 and suppressing the STAT1-miR-155  
548 signaling axis. *Oncoimmunology* **5**, e1211219 (2016).
- 549 35. G. Stalhammar, S. Seregard, H. E. Grossniklaus, Expression of immune checkpoint  
550 receptors Indoleamine 2,3-dioxygenase and T cell Ig and ITIM domain in metastatic versus  
551 nonmetastatic choroidal melanoma. *Cancer Med* **8**, 2784-2792 (2019).
- 552 36. X. Yang, X. Jiang, G. Chen, Y. Xiao, S. Geng, C. Kang, T. Zhou, Y. Li, X. Guo, H. Xiao, C. Hou,  
553 R. Wang, Z. Lin, X. Li, J. Feng, Y. Ma, B. Shen, Y. Li, G. Han, T cell Ig mucin-3 promotes  
554 homeostasis of sepsis by negatively regulating the TLR response. *Journal of immunology*  
555 **190**, 2068-2079 (2013).
- 556 37. J. Callis, The ubiquitination machinery of the ubiquitin system. *Arabidopsis Book* **12**, e0174  
557 (2014).
- 558 38. Y. X. Ji, Z. Huang, X. Yang, X. Wang, L. P. Zhao, P. X. Wang, X. J. Zhang, M. Alves-Bezerra,  
559 L. Cai, P. Zhang, Y. X. Lu, L. Bai, M. M. Gao, H. Zhao, S. Tian, Y. Wang, Z. X. Huang, X. Y.  
560 Zhu, Y. Zhang, J. Gong, Z. G. She, F. Li, D. E. Cohen, H. Li, The deubiquitinating enzyme  
561 cylindromatosis mitigates nonalcoholic steatohepatitis. *Nature medicine* **24**, 213-223  
562 (2018).
- 563 39. J. Lee, E. W. Su, C. Zhu, S. Hainline, J. Phuah, J. A. Moroco, T. E. Smithgall, V. K. Kuchroo, L.  
564 P. Kane, Phosphotyrosine-dependent coupling of Tim-3 to T-cell receptor signaling  
565 pathways. *Mol Cell Biol* **31**, 3963-3974 (2011).
- 566 40. W. Wang, M. Jiang, S. Liu, S. Zhang, W. Liu, Y. Ma, L. Zhang, J. Zhang, X. Cao, RNF122  
567 suppresses antiviral type I interferon production by targeting RIG-I CARDS to mediate  
568 RIG-I degradation. *Proceedings of the National Academy of Sciences of the United States*  
569 *of America* **113**, 9581-9586 (2016).
- 570
- 571

572 **Figures and figure legends**

573

574

Figure 1

575

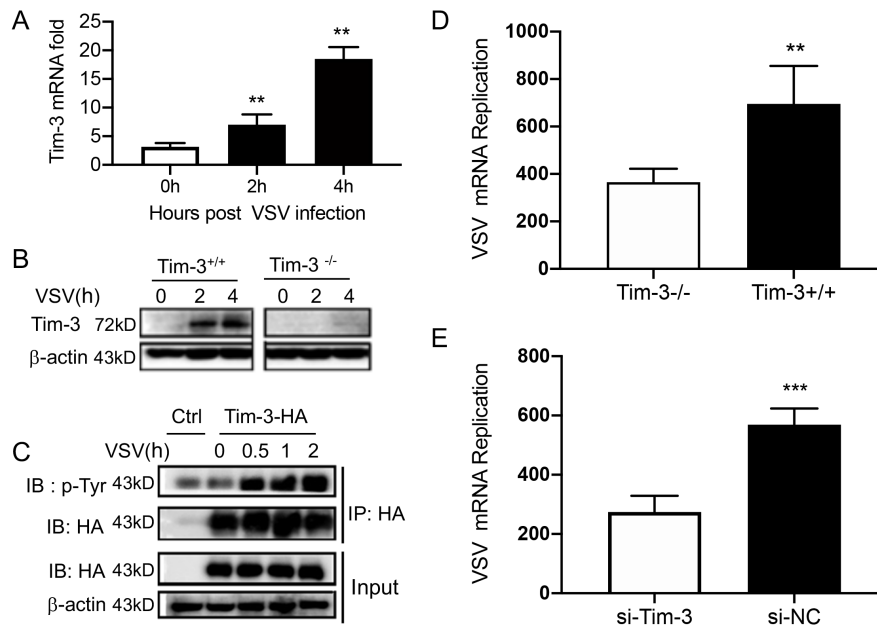

576

577 **Fig.1 Tim-3 inhibits VSV replication in macrophages.**

578 (A) qPCR analysis of Tim-3 mRNA expression in RAW264.7 macrophages infected with

579 VSV for the indicated hours. (B) Peritoneal macrophages were isolated from wild type

580 (Tim-3<sup>+/+</sup>) and Tim-3 knock out mice (Tim-3<sup>-/-</sup>) and were infected with VSV for indicated

581 times. Then the expression of Tim-3 were analyzed by western blot analysis. (C and D)

582 Peritoneal macrophages obtained from Tim-3<sup>+/+</sup> and Tim-3<sup>-/-</sup> mice and RAW264.74

583 macrophages silenced of Tim-3 (si-Tim-3) and RAW264.7 macrophages (si-NC) were

584 challenged by VSV for 8 hours, then cells were harvested for VSV mRNA replication by

585 qPCR. The results shown in all panels were performed three times. \*\*p<0.01, \*\*\*p<0.001

586

587

588

589

Figure 2

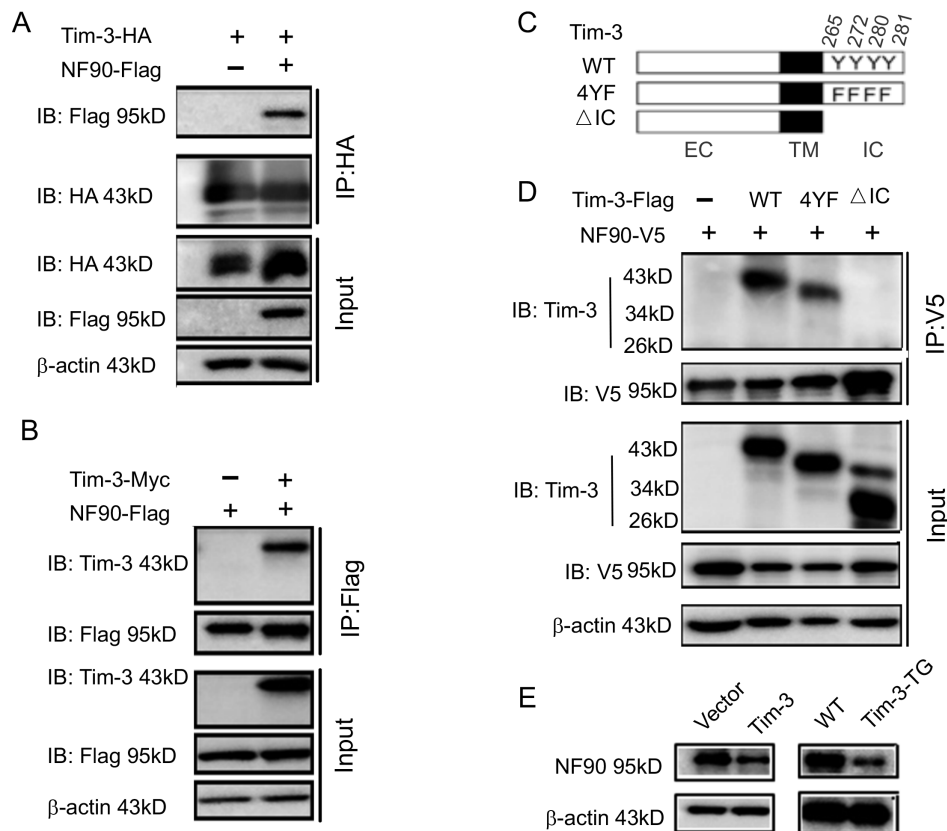

590

591 **Figure 2. Tim-3 interacts with and inhibits NF90.** (A and B) Protein complex of Tim-3  
 592 and NF90 overexpressed in cells. HEK293T cells were transfected with plasmids  
 593 encoding HA-Tim-3, Flag-NF90, and Myc-Tim-3 for 24 h, immunoprecipitated with HA or  
 594 Flag antibody, respectively, and detected by western blot for the indicated antibodies. (C  
 595 and D) Interaction of Tim-3 intracellular domain with NF90. Schematic structure of Tim-3  
 596 and the derivatives used are shown (C). Whole cell lysate of HEK293T cells transfected  
 597 with Flag-Tim-3 (WT), Flag-Tim-3 (Del), Flag-Tim-3 (4YF), and V5-NF90 were used for  
 598 immunoprecipitation and immunoblotting, as indicated (D). (E) Immunoblot analysis of  
 599 NF90. HEK293T cells were transfected with Tim-3 plasmid for 24 h, and lysates were  
 600 detected for NF90 expression by western blot (left). Peritoneal macrophages from WT  
 601 and Tim-3-TG mice were lysed and NF90 protein were detected by western blot (right).  
 602 The results shown in A, B, D, F were performed three times.

603

604

605

Figure 3

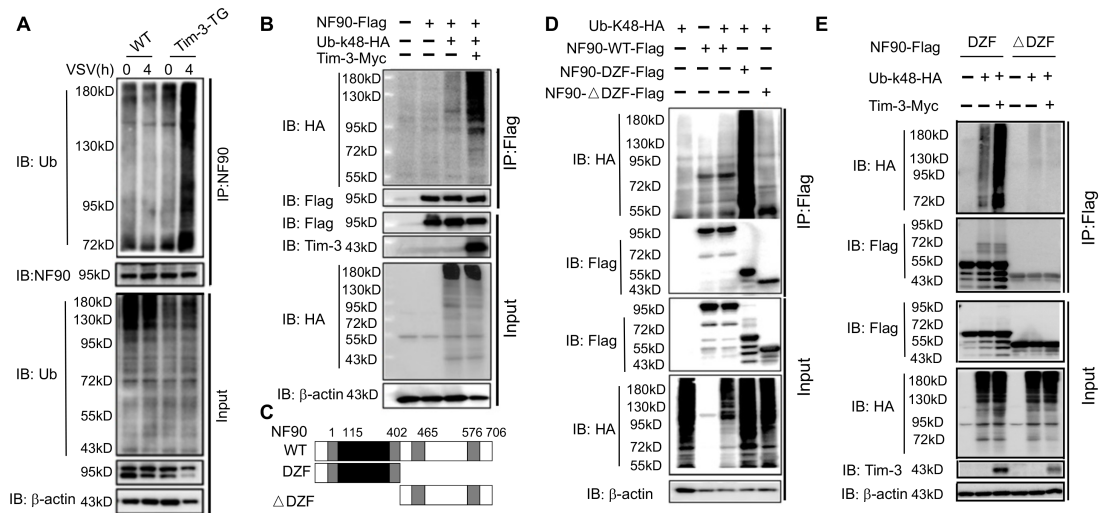

606

607 **Figure 3 Tim-3 promotes the ubiquitination of NF90 at the DZF domain**

608 (A) Tim-3 enhances the ubiquitination of NF90 in macrophages in response to VSV  
 609 challenges. Peritoneal macrophages in WT and Tim-3-TG mice were infected with VSV  
 610 4 h and cells were treated with MG132 (20 ug/ml) for 6 h before harvesting protein lysates,  
 611 followed by western blot analysis of the total-Ub of NF90 immuno-precipitated with  
 612 antibody to ILF3 (NF90). (B) Tim-3 promotes the ubiquitination of NF90. HEK293T cells  
 613 were transfected with plasmids encoding Flag-NF90 or HA-Ub-K48, Tim-3-Myc for 24 h,  
 614 treated with MG132 (20 ug/ml) for 6 h, immunoprecipitated with Flag antibody, and then  
 615 detected by western blot for the indicated antibodies. (C) Schematic structure of NF90 and  
 616 the derivatives used were shown. (D-E) Tim-3 promotes the K48-Ub modification of NF90  
 617 at the DZF domain. HEK293T cells were transfected with the indicated plasmids for 24 h  
 618 and treated with MG132 (20 ug/ml) for 6 h. The cells were then lysed, immunoprecipitated  
 619 with Flag antibody, and detected by western blot using the indicated antibodies. At least  
 620 three independent experiments were conducted for all panels.

621

622

623

Figure 4

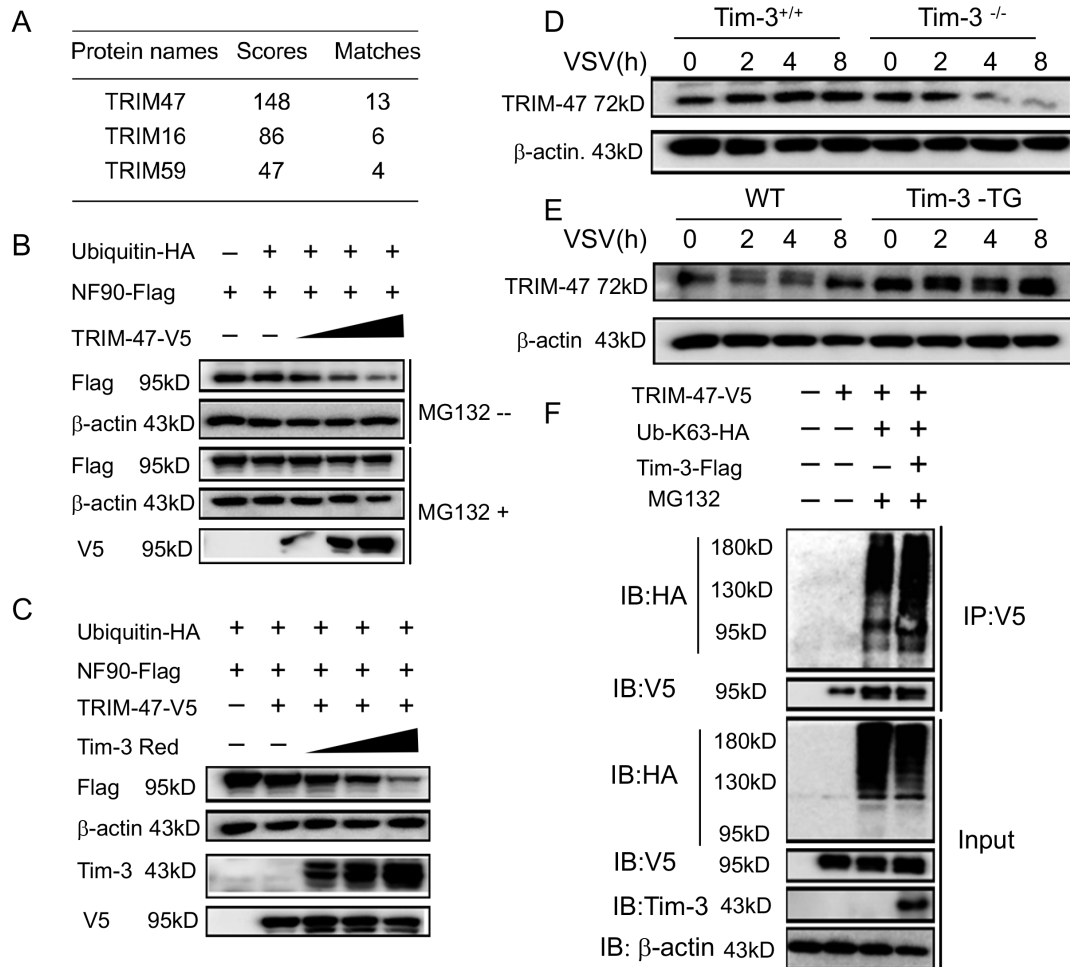

624

625 **Figure 4: Involvement of TRIM-47 in Tim-3- mediated NF90 degradation**

626 (A) E3 ligases identified by mass spectrometry for top peptide hits (defined by Mascot  
 627 score) associated with NF90 ubiquitination. (B) TRIM47 promotes NF90 degradation in a  
 628 proteasome-dependent manner. Plasmids encoding Flag-NF90, HA-Ubiquitin, along with  
 629 increasing amounts of V5-TRIM47 (0.5, 1.0, and 2.0 ug) were transfected into 293T cells  
 630 for 24 h, cells were treated with and without MG132 (20 ug /ml), respectively, followed by  
 631 western blot to examine the NF90 protein level. (C) Tim-3 accelerates TRIM47-mediated  
 632 NF90 degradation in a dose-dependent manner. HEK293T cells were transfected with  
 633 plasmids encoding Flag-NF90, HA-ubiquitin and V5-TRIM47 and an increasing dose of  
 634 plasmid encoding Red-Tim-3 (0.5, 1.0, and 2 ug) for 24 h. The protein level of NF90 was  
 635 examined in cells. (D and E) Tim-3 upregulates TRIM47 in protein levels. TRIM47 protein  
 636 levels were analyzed by Immunoblot in lysates from *Tim-3<sup>+/+</sup>* or *Tim-3<sup>-/-</sup>* and WT or Tim-3-



637 TG macrophages infected with VSV for the indicated time. (F) Tim-3 facilitates K63-linked  
638 ubiquitination mediated by TRIM47. Plasmids encoding HA-Ub-K63, V5-TRIM47, and  
639 Flag-Tim-3 were transfected into HEK293T cells. Cells were treated with MG132 (20 ug/ml)  
640 for 6 h, and cell lysates were immunoprecipitated with Flag antibody and detected by  
641 western blot for K48-Ub levels. At least three independent experiments were conducted for  
642 all panels.  
643

644

Figure 5

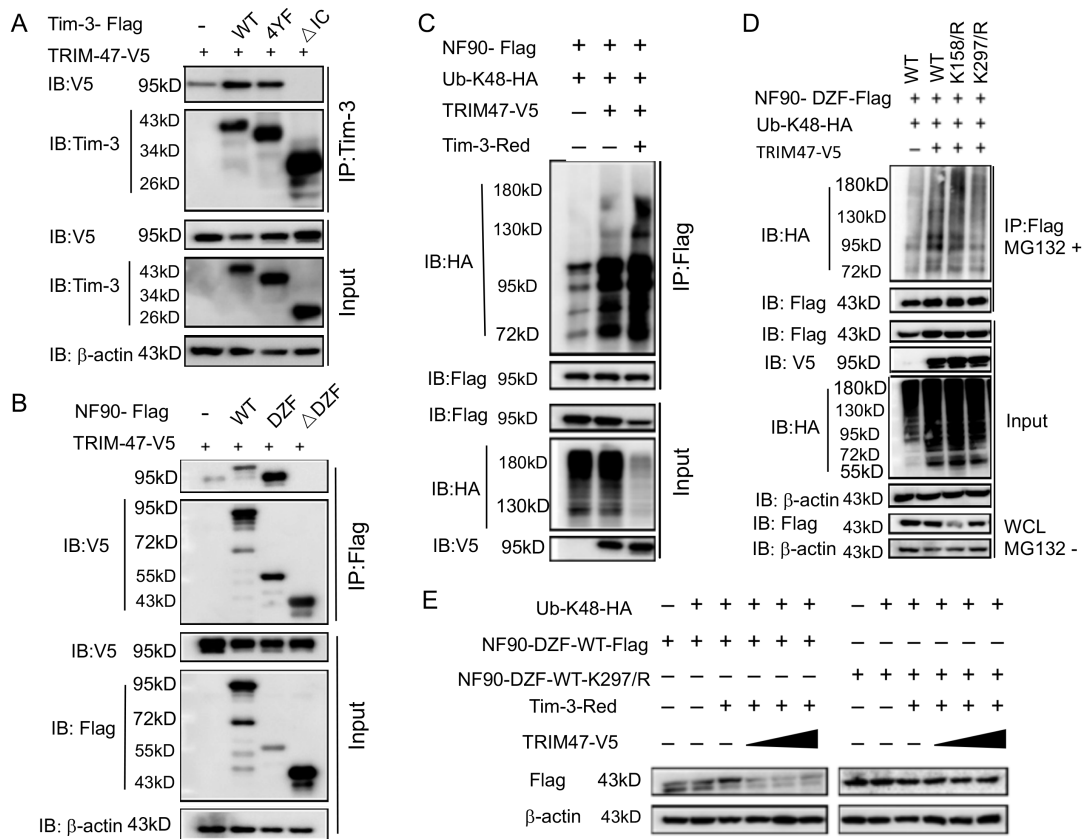

645

646 **Figure 5 Tim-3 recruits TRIM47 to DZF domain of the NF90 within which Lys297 is a**  
 647 **critical site for TRIM47-mediated K48-linked ubiquitination and degradation of NF90.**

648 (A&B) The intracellular domain of Tim-3 and the DZF domain of NF90 interacts with  
 649 TRIM47 respectively. HEK293T cells were transfected with the indicated plasmids for 24 h  
 650 and treated with MG132 (20 ug/ml) for 6 h. The cells were then lysed, immunoprecipitated  
 651 with Tim-3 or Flag antibody, and detected by western blot using the indicated antibodies.

652 (C) Tim-3 promotes NF90 degradation mediated by E3 ligase TRIM47. HEK293T cells  
 653 were transfected with plasmids encoding HA-Ub-K48, V5-TRIM47, Flag-NF90, and Red-  
 654 Tim-3, and treated with MG132 (20ug/ml) for 6h. Cell lysates were then  
 655 immunoprecipitated with Flag antibody and analyzed by Western Blot using the indicated

656 antibodies. (D) Residue K297 of NF90 is the major site of TRIM47-mediated K48-linked  
 657 ubiquitination. Flag-NF90-DZF (WT), or K R mutants, HA-Ub-K48, and V5-TRIM47 were  
 658 transfected into HEK293T cells for 24 h. Cells were then treated with MG132 (20ug /ml) for  
 659 6 h. Cell lysates were analyzed by western blot for K48-linked ubiquitination of NF90. (E)

660 Residue K297 is the decisive site in TRIM47-mediated degradation of NF90. Plasmids  
661 encoding Flag-NF90-DZF (WT), or K297R mutants, PDsRed-Tim-3, HA-Ub-K48, and V5-  
662 TRIM47 were transfected into 293T cells, and cell lysates were examined by western blot  
663 for the indicated proteins. At least three independent experiments were conducted for all  
664 panels.  
665

666

Figure 6

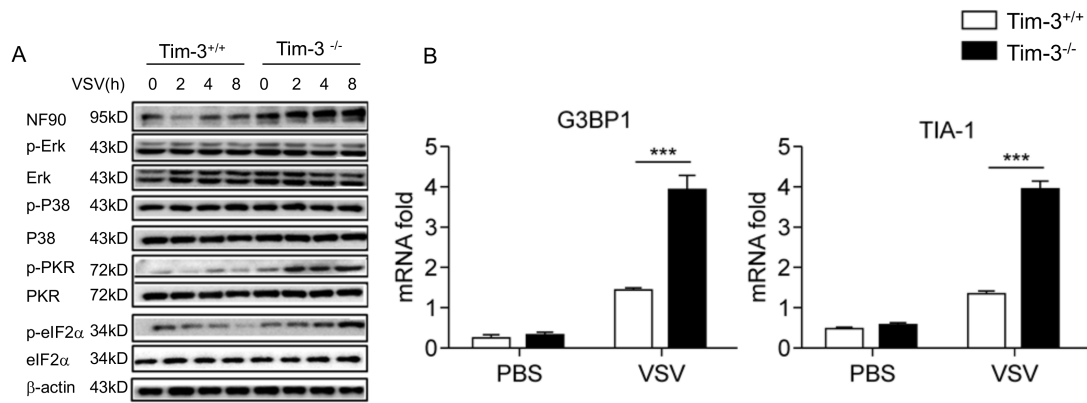

667

668

669 **Figure 6: Tim-3 selectively inhibits the phosphorylation of PKR and eIF2α, increases**  
670 **the expression of SGs markers G3BP1 and TIA-1 in macrophages**

671 (A) Lysates from *Tim-3*<sup>+/+</sup> and *Tim-3*<sup>-/-</sup> peritoneal macrophages infected with VSV were  
672 analyzed by immunoblot for the indicated proteins. (B) *Tim-3*<sup>+/+</sup> and *Tim-3*<sup>-/-</sup> peritoneal  
673 macrophages were infected with VSV for 8 hours, and then TIA-1 or G3BP-1 mRNA  
674 transcription were analyzed by qPCR. The results shown are representative of three  
675 independent experiments. \*\*\*, p < 0.001

676

677

678

Figure 7

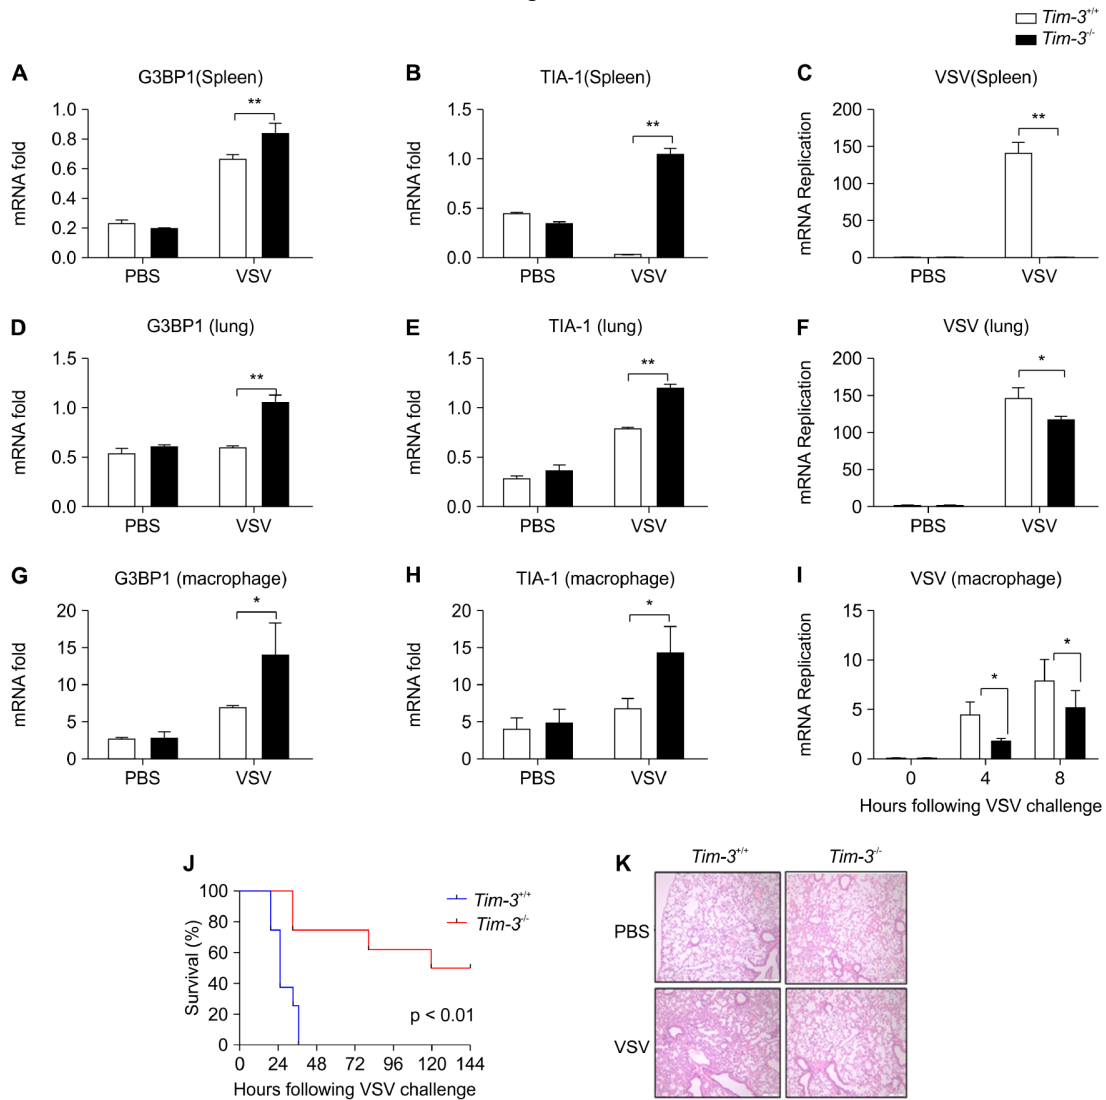

679

680 **Figure 7 *Tim-3* deficiency upregulates G3BP1 and TIA-1 and protects mice from**  
 681 **VSV infection. (A, B and D, E and G, H) Detection of mRNA transcription of G3BP1 and**  
 682 **TIA-1 in organs and peritoneal macrophages by qPCR after *Tim-3*<sup>+/+</sup> and *Tim-3*<sup>-/-</sup> mice (n**  
 683 **= 5 per group) were intraperitoneally injected with VSV for 24 h. (C, F and I) qPCR**  
 684 **analysis of VSV loads in organs and peritoneal macrophages after *Tim-3*<sup>+/+</sup> and *Tim-3*<sup>-/-</sup>**  
 685 **mice (n = 5 per group) were intraperitoneally injected with VSV for 24 h. (J) *Tim-3*<sup>+/+</sup> and**  
 686 ***Tim-3*<sup>-/-</sup> mice (~7-week-old) were intraperitoneally injected with VSV (1 × 10<sup>8</sup> pfu/g) (n = 10**  
 687 **per group) followed by recording survival of both groups. P < 0.01. (K) The lung tissues**  
 688 **from *Tim-3*<sup>+/+</sup> and *Tim-3*<sup>-/-</sup> mice (C, F, and I) were stained with hematoxylin and eosin, and**  
 689 **their pathology analyzed in response to VSV. The results shown are representative of**  
 690 **three independent experiments. \*, p<0.05; \*\*p<0.01.**

691

Fig.8

692

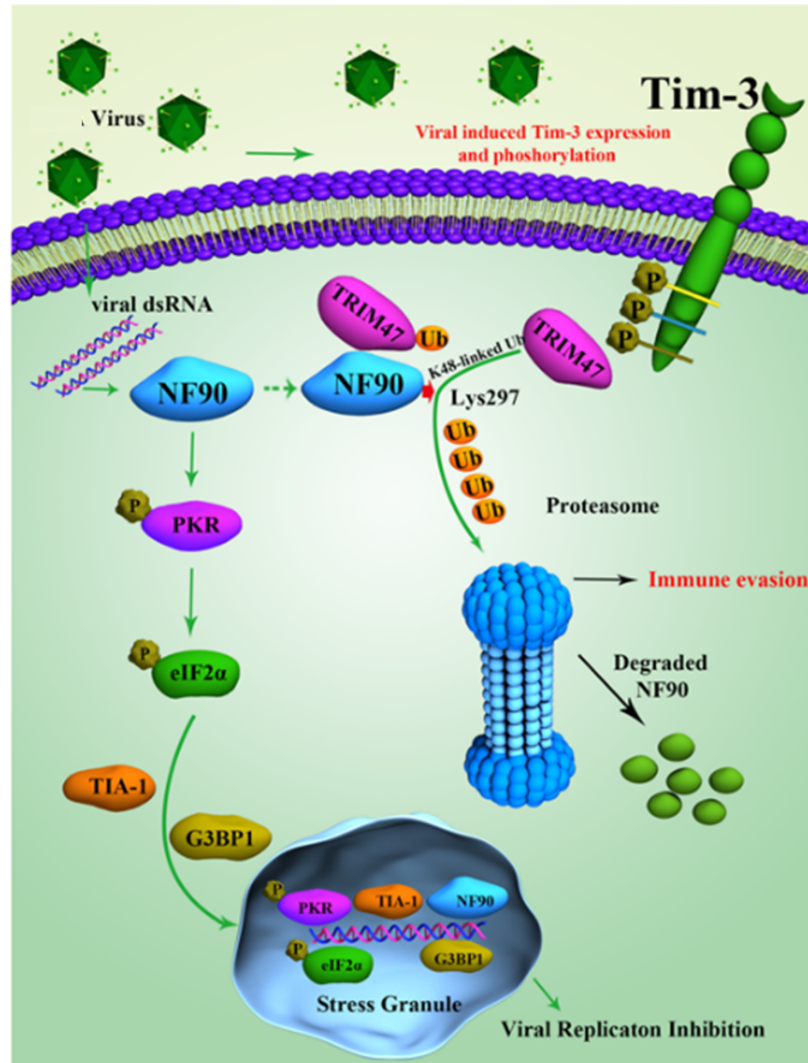

693

694 **Figure 8: Schematic diagram of how Tim-3 inhibits NF90-SGs pathway in**  
695 **macrophages during infection.**

696 Upon VSV infection, Tim-3 is activated and upregulated. The activation of Tim-3 in turn  
697 recruited the E3 ubiquitin ligase TRIM47 to the zinc finger domain of NF90 and initiated a  
698 proteasome-dependent degradation of the NF90 via K48-linked ubiquitination at Lys297.  
699 The negative regulation of NF90 by Tim-3 blocked the RNA virus triggered and NF-90-  
700 SGs mediated antiviral immunity, and finally led to virus immune evasion.

701
